# Molecular Epidemiology of Measles in India, 2005–2010

Niteen Wairagkar,<sup>1</sup> Deepika Chowdhury,<sup>1</sup> Sunil Vaidya,<sup>1</sup> Sarika Sikchi,<sup>1</sup> Naseem Shaikh,<sup>1</sup> Laxman Hungund,<sup>1</sup> R. S. Tomar,<sup>1</sup> D. Biswas,<sup>2</sup> K. Yadav,<sup>2</sup> J. Mahanta,<sup>2</sup> V. N. R. Das,<sup>3</sup> Prasanna Yergolkar,<sup>4</sup> P. Gunasekaran,<sup>5</sup> D. Raja,<sup>5</sup> R. Jadi,<sup>1</sup> Nalini Ramamurthy,<sup>6</sup> A. C. Mishra,<sup>1</sup> and MeaslesNetIndia collaborators<sup>a</sup>

<sup>1</sup>WHO Regional Measles Reference Laboratory, National Institute of Virology, Pune; <sup>2</sup>Regional Medical Research Center, Dibrugarh; <sup>3</sup>Rajendra Memorial Research Institute of Medical Sciences, Patna; <sup>4</sup>WHO National Measles Laboratory, Bangalore Field Unit of National Institute of Virology, Pune; <sup>5</sup>WHO National Reference Laboratory for Measles and Rubella, King Institute of Preventive Medicine, Chennai; and <sup>6</sup>World Health Organization-South East Asia Region Office, New Delhi, India

Measles is a childhood disease that causes great morbidity and mortality in India and worldwide. Because measles surveillance in India is in its infancy, there is a paucity of countrywide data on circulating *Measles virus* genotypes. This study was conducted in 21 of 28 States and 2 of 7 Union Territories of India by MeaslesNetIndia, a national network of 27 centers and sentinel practitioners. MeaslesNetIndia investigated 52 measles outbreaks in geographically representative areas from 2005 through June 2010. All outbreaks were serologically confirmed by detection of antimeasles virus immunoglobulin M (IgM) antibodies in serum or oral fluid samples. Molecular studies, using World Health Organization (WHO)-recommended protocols obtained 203 N-gene, 40 H-gene, and 4 M-gene sequences during this period. Measles genotypes D4, D7, and D8 were found to be circulating in various parts of India during the study period. Further phylogenetic analysis revealed 4 lineages of Indian D8 genotypes: D8a, D8b, D8c, and D8d.

This study generated a large, countrywide sequence database that can form the baseline for future molecular studies on measles virus transmission pathways in India. This study has created support and capabilities for countrywide measles molecular surveillance that must be carried forward.

Measles is a childhood disease that causes great morbidity and mortality throughout the world. Worldwide, the number of reported measles cases recently declined by 67%, from 852,937 in 2000 to 278,358 in 2008, and deaths attributed to measles declined by 78% [1]. However, risk for illness and death from measles still exists in countries with variable routine vaccination

coverage, as in India, where measles is a significant public health problem. Though various studies have described the measles epidemiology in India, the country lacks knowledge generated from systemic countrywide measles surveillance. In the absence of countrywide case-based surveillance in other countries, outbreak surveillance coupled with molecular epidemiology studies have provided important data for mapping transmission routes, documenting the elimination of endemic virus strains, and indicating risk groups [2, 3]. Taking a similar approach, the National Institute of Virology (NIV) in Pune, India, was instrumental in initiating outbreak surveillance and molecular studies that detected the presence of and described the circulation of indigenous genotypes D4, D7, and D8 [4, 5].

*Measles virus* (MeV), an enveloped virus with a single-stranded, negative-sense RNA genome, is a member of the genus *Morbillivirus* within the family Paramyxoviridae. MeV is highly contagious and causes a disease characterized by high fever, cough, coryza, conjunctivitis, and

Potential conflicts of interest: none reported.

Supplement sponsorship: This article is part of a supplement entitled "Global Progress Toward Measles Eradication and Prevention of Rubella and Congenital Rubella Syndrome", which was sponsored by the Centers for Disease Control and Prevention.

<sup>a</sup>Please see the Appendix for a list of the MeaslesNetIndia collaborators.

Correspondence: Niteen Wairagkar, MD, Regional Reference Measles Laboratory, National Institute of Virology, 20 A Ambedkar Rd., Pune, India, 411001 (niteenv@yahoo.com).

**The Journal of Infectious Diseases** 2011;204:S403–S413

© The Author 2011. Published by Oxford University Press on behalf of the Infectious Diseases Society of America. All rights reserved. For Permissions, please e-mail: journals.permissions@oup.com

0022-1899 (print)/1537-6613 (online)/2011/204S1-0051\$14.00

DOI: 10.1093/infdis/jir150

appearance of a maculopapular rash. MeV is a monotypic virus serologically, but genetic variability exists among wild-type strains [6]. The protocols and nomenclature for genetic characterization of wild-type MeVs have been standardized by the World Health Organization (WHO), which helped in detecting circulation of 23 genotypes of MeV [7]. In June 2010, investigators detected a new genotype of measles provisionally known as d11 (awaiting final designation by the WHO) [8]. Molecular studies have been instrumental in many countries for tracking national and international transmission pathways of MeV strains [3, 9–13]. During 2005 and 2006, virological surveillance activities expanded throughout Southeast Asia, and D4, D7, D8, D9, D5, and G3 genotypes have since been detected in the countries of the region [14].

Only limited genotype data from Maharashtra and Tamil Nadu states was available till 2005 [4], and the study was extended to other geographic areas of India subsequently [15]. The countrywide network of collaborating centers was established, outbreaks of measles were investigated, and the baseline sequence database of measles genotypes circulating in all the geographic areas of India was created. This study

describes the molecular epidemiology of measles from 2005 to 2010.

## MATERIALS AND METHODS

### Establishment of MeaslesNetIndia Network

To accomplish the objectives of this study, a voluntary participatory network of 17 centers in India was started in August 2005 and named MeaslesNetIndia [15]. In 2006, MeaslesNetIndia enrolled private pediatric and general practitioners from various states, in the first large-scale public–private partnership for measles-related work. Subsequently, in 2008, network expanded to include 10 centers from the northeastern region of India. Network centers included Indian Council of Medical Research (ICMR) centers, medical colleges, and other research centers, giving geographical representation throughout the country (Figure 1). The participating sentinel-site collaborators were trained at 3 workshops on various aspects of this study, including outbreak investigation strategies, specimen collection, laboratory diagnostics, and the role of each collaborator. These centers performed outbreak investigations using local public

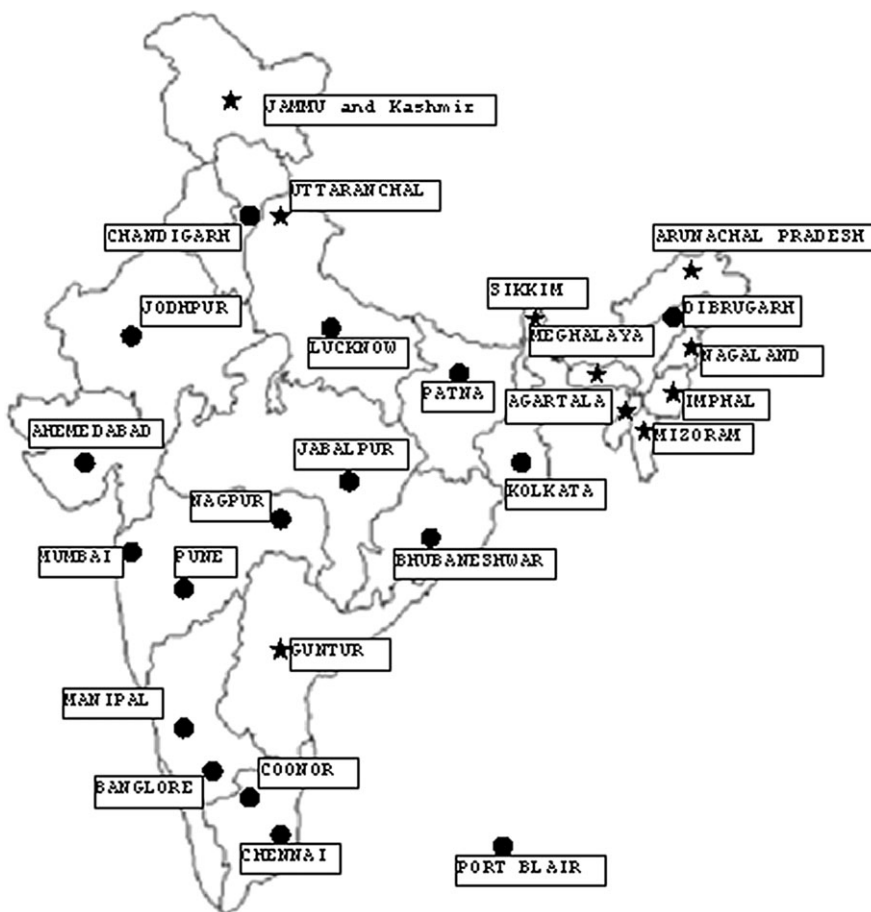

**Figure 1.** MeaslesNetIndia: geographic representation.

health resources. Financial assistance was made available through the WHO for the training of participants, logistics, and testing at NIV, Pune.

### **WHO-SEAR Measles and Rubella Laboratory Network**

The World Health Organization Regional Office for South-East Asia (WHO-SEAR) measles laboratory network was established in 2003 and has expanded in a phased manner to 19 laboratories in 2009, with 1 regional reference laboratory and 18 national laboratories, 5 of which are in India. The laboratories were recruited through consultation with the national governments. In India, WHO has designated NIV at Pune as Regional Reference Laboratory for Measles and the King Institute of Preventive Medicine (KIPM), Chennai, as National Reference Laboratory for Measles and Rubella. All laboratories in the network have been accredited, and all contributed isolates and clinical specimens for virus characterization.

### **Outbreak Investigations by MeaslesNetIndia**

During 2005–2010, the MeaslesNetIndia network investigated 52 suspected measles outbreaks from 23 states. Investigators used the WHO definition of measles case, which is any person with fever of 38°C or greater, and maculopapular rash (ie, nonvesicular), and any 1 of the following: cough, coryza, or conjunctivitis; any person in whom the health professional suspected measles was included in the investigations [16]. Outbreak was defined as the occurrence of 5 clinical measles cases in a 15-day period from a population of approximately 5000. Appropriate specimens for serologic confirmation and virus isolation were collected and transported in appropriate cold-chain conditions to NIV for laboratory studies. Sporadic cases were investigated from Imphal (Manipur state), Dimapur (Nagaland), Dabra (Madhya Pradesh), and Valsad (Gujarat), areas where no outbreaks were reported. Informed consent was obtained as appropriate using standard forms translated into local languages by the collaborators.

### **Specimen Collection**

Investigators collected throat swabs and urine specimens for virus isolation and blood samples for serology from 5–10 representative acute measles cases in each outbreak. Oral fluid proved to be the most convenient sample for collection and transport to the laboratory in Indian climatic conditions wherever serum could not be obtained [17]. Collected clinical samples (throat swabs, urine, oral fluid, and blood) were processed and stored appropriately until transportation to NIV at Pune. For molecular studies on 1 case of fulminant subacute sclerosing panencephalitis (SSPE) and 1 case of measles inclusion body encephalitis (MIBE), brain and serum/cerebrospinal fluid samples were referred to NIV from Human Brain Tissue Repository of the Department of Neuropathology, National Institute of Mental Health and Neuro Sciences, Bangalore. A total of 753

sera, 283 throat swabs, 80 oral fluids, and 302 urine samples from 845 measles cases were received at NIV during the study period.

### **Serological Studies**

We serologically confirmed all outbreaks as measles by immunoglobulin M (IgM) enzyme-linked immunosorbent assay (ELISA) with WHO-recommended kits (Dade Behring, Siemens, or Microimmune) using manufacturers' instructions. Oral fluid samples were also tested by Microimmune kits for detection of IgM antibodies to measles. The samples that tested negative for measles IgM were tested for rubella IgM using Microimmune kits.

### **Virological Studies**

We isolated the virus and identified measles strains according to the standardized methods at NIV, Pune, NIV Bangalore, and KIPM, Chennai, using B95a cells or Vero-SLAM cell line (from Dr. Yanagi via Centers for Disease Control and Prevention [CDC]-WHO for Network Laboratories) according to the standard CDC - WHO protocol. [18, 19] In brief, we inoculated processed throat swabs and urine samples onto the cell lines and observed them for cytopathic effect (CPE). We blind-passaged inoculated cells up to 3 times before discarding them as negative for virus isolation. We harvested cells when the CPE was maximum (3+ to 4+) in the third-passage culture flasks. All isolates were identified as measles by immuno-fluorescence assay or RT-PCR and sequencing.

### **Molecular Studies**

We performed reverse-transcription polymerase chain reaction (RT-PCR) and sequencing studies on the clinical samples from suspected measles cases and MeV isolates obtained or sent by the collaborators. We extracted viral RNA from infected cell lysates or clinical specimens using TRIzol LS reagent according to the manufacturer's instructions. RNA pellets were dried and resuspended in 50 µl of nuclease free water and stored at –70°C until amplification by RT-PCR. We performed sequencing studies by standardized protocols using WHO-recommended primers. We used primers MV63 (5'CCT CGG CCT CTC GCA CCT AGT 3') and MV60 (5'GCT ATG CCA TGG GAG TAG GAG TGG 3') to sequence the 456 bp fragment of the N-gene COOH terminal according to WHO recommendations. We used primers H2 (GAT CAT CCA CAA TGT CAC CAC), H4R (AGA TGA CAC ATT GTA ACC TCG), H4 (CGA GGT TAC AAT GTG TCA TCT), H6R (CGT ATG AAG GAA TCC TGT TAT), H7 (CCG AGA TTC AAG GTT AGT CCC), and H10 (GTA TGC CTG ATG TCT GGG TGA) to amplify the 1854 bp complete-coding region of the H gene [3, 4, 7].

### **Sequence Analysis**

We derived the sequences of the measles N-gene RT-PCR products by automated sequencing with primers MV60 and

MV63 and the BigDye terminator 3.1v chemistry using reaction conditions that were recommended by the manufacturer (ABI 373, ABI 3100, Perkin Elmer-Applied Biosystems). We proof-read and edited sequences with Sequencer™ (Gene Codes Corporation). Measles N- and H-gene sequences obtained in this study were confirmed with both strands and aligned with WHO standard reference N- and H-gene sequences [14] using software ClustalX version 1.83. We conducted a phylogenetic analysis using MEGA version 4 [20]. We assessed the robustness of the groupings using bootstrap resampling of 1000 replicates, and we visualized the trees with MEGA programs. We used National Center for Biotechnology Information Basic Logical Alignment Search Tool (NCBI BLAST) analysis to find percent nucleotide identity (PNI) with the related strains.

### Submission to Public Genetic Databases

We prepared sequence cards for all the sequences, including the available clinico-epidemiological information on each strain. We deposited 243 representative nucleotide sequences (N and H gene) in GenBank (under accession numbers EU812245-EU812316, FJ387130-FJ387157, FJ765064-FJ765087, FJ979795-FJ979797, FJ968742, FJ719484-FJ719489, FJ223133-FJ223168, FJ19763, GU306169-GU306174, GU827659, GU953671-GU953672, GQ420695-GQ420699, HM567314-HM567315, HM452160-HM452161, HM358867-HM358877, AY873971-AY873981, DQ987230-DQ987235, DQ335129-DQ335131, DQ345392-DQ345393, AY953414-AY953418, AY957557-AY957558, DQ923615, AY841168, HQ148303-HQ148309). All the sequences were deposited into the WHO Sequence Database and the MeaNS database of the WHO Measles Laboratory Network.

Additionally, the Indian Measles Sequence Database is maintained at NIV for future use as part of the measles elimination program. We performed detailed analyses to find the intragenotypic diversity of measles strains circulating in India.

## RESULTS AND DISCUSSION

This paper provides an overview of measles-outbreak investigations and molecular studies conducted during 2005 till June 2010, giving comprehensive baseline data for India. Of the total 28 states and 7 union territories in India, 23 were covered during this investigation. A total of 52 outbreaks and several sporadic cases (where outbreaks were not reported) were investigated. Table 1 describes the key data elements (geographic location, number of cases, age range, serological confirmation, and genotypes detected) from the outbreaks investigated by MeaslesNetIndia. The details of individual outbreak investigations have been published elsewhere [21–24]. Because the aim of the study was to create countrywide baseline molecular data on circulating genotypes of MeV, we investigated only representative outbreaks from the study period.

Table 2 describes the age distribution among 845 clinically suspected measles cases from whom samples were collected and confirmed as measles by IgM ELISA. This study population neither reflects the extent of the outbreaks nor does it include all cases. Convenient sampling could not be ruled out. The proportion of each age group for cases investigated, samples tested, and positive measles results did not differ significantly from each other, indicating representativeness. The overall measles IgM-positivity rate was 62.8%, and was highest among persons aged 1–3 years, as Table 2 indicates. We found no significant variation of measles seropositivity across the age groups. Rubella cases were detected sporadically in our study. Though a study in southern India detected rubella cases in field investigations of measles outbreak [25], we didn't detect extensive presence of *Rubella virus* in the study period. We found persons aged 1–6 years (51%), and a notable proportion of cases (30.3%) was recorded among persons aged 6–15 years, as shown in Table 3. Small proportions of cases were <1 year of age. Measles in infants, especially among those in orphanages, have been documented in India in previous studies in Pune and Chennai [5, 22]. Table 1 gives reported age ranges from each outbreak in the study period, taken from records maintained by the public health authorities of the respective area. The range of age groups affected by outbreaks in different geographic areas indicates the diversity of measles transmission patterns in India. This finding calls for standardized investigation of outbreaks, in which all cases are considered and the extent of the outbreak and the age group of the study population are not limited. Studies in Kashmir and Tamil Nadu documented cases among persons >5 years of age [21, 23].

Suspected cases among persons >15 years of age were encountered in outbreaks investigated in post-tsunami camps in Andaman, East Siang in Arunachal Pradesh, Supoul in West Bengal, Kangra in Himachal Pradesh, Kargil in Jammu, and Kashmir states. Serological confirmations were done by IgM ELISA on serum or oral fluid specimens. Of 64 suspected measles cases among persons aged >15 years, 33 were confirmed as measles by IgM ELISA, including 3 pregnant women. Adolescent outbreaks in Jammu and Kashmir [21], an outbreak in Arakkonum, Vellore district of Tamil Nadu [26], and an outbreak among medical students in Manipal, Karnataka, (Arun Kumar, personal communication) were also confirmed as measles by laboratory studies. These reports suggest the presence of a susceptible adolescent population in some areas, probably where they neither had an opportunity for immunization nor were naturally exposed to measles. The susceptibility of this age group must be investigated and documented further in nationwide studies.

Table 4 describes the seasonality of laboratory-confirmed measles cases. Data indicated measles transmission throughout the year in India, with pattern variations between geographic areas. The seasonal patterns would clearly be detected by countrywide laboratory surveillance. Seasonality in this table is

**Table 1. Measles Outbreaks Investigated by MeaslesNetIndia.**

| State             | Period                                           | Number of cases           | Age range                                 | Serology confirmation         | Measles genotypes          |
|-------------------|--------------------------------------------------|---------------------------|-------------------------------------------|-------------------------------|----------------------------|
| Andaman           | Feb 2006–Mar 2006                                | 51                        | 8 mo–33 y                                 | Yes                           | D8                         |
| Andhra Pradesh    | Nov 2006–Apr 2007                                | 22                        | 1–13 y                                    | Yes                           | D4, D8                     |
| Arunachal Pradesh | Dec 2007–Nov 2009                                | 21                        | 1.4–22 y                                  | Yes                           | D4, D8                     |
| Assam             | Mar 2008–May 2009                                | 25                        | 6 mo–17 y                                 | Yes                           | D8                         |
| Bihar             | Dec 2005–Apr 06                                  | 310 (3 deaths)            | 8 mo–26 y                                 | Yes                           | D4, D8                     |
| Chandigarh        | Feb 2006–July 2006                               | 25                        | 5 mo–5 y                                  | Yes (1 Rubella IgM+)          | D8                         |
| Chhatisgarh       | Nov 2006                                         | 60                        | 6 mo–7.10 y                               | Yes                           | NA                         |
| Gujarat           | Nov 2008–Apr 2010                                | 84 (6 deaths)             | 3 mo–17 y (>5 y: 47%)                     | Yes                           | D4, D8                     |
| Himachal Pradesh  | Sep 2006                                         | 30                        | 4–12 y                                    | Yes                           | D4                         |
| Jammu & Kashmir   | Mar 2007–May 2007                                | 401                       | 8 mo–15 y (>15 y: 126 cases)              | Yes                           | D4                         |
| Karnataka         | Mar 2004–Jun 2004 (Retrospectively investigated) | 12                        | Adult medical students 20–27 y            | Yes (2 IgM+)                  | D8-like (partial sequence) |
| Karnataka         | Feb 2003                                         | 1                         | Fulminant SSPE case                       | NA                            | D7                         |
| Karnataka         | Jun 2005                                         | 924                       | 1–15 y                                    | Yes                           | D8, D4                     |
| Kerala            | 2010                                             | 130                       | <1–15 y                                   | Yes                           | D8                         |
| Madhya Pradesh    | Mar 2007                                         | 5                         | 6 mo–6 y                                  | Yes                           | D4                         |
| Maharashtra       | Jan 2006, Mar 2006 Apr 2010                      | 330 (1 encephalitis case) | 6 mo–16 y                                 | Yes                           | D4, D7, D8                 |
| Manipur           | Nov 2009                                         | 1                         | 11 y                                      | No (IgM NEG)                  | D8                         |
| Nagaland          | Apr 2008–Nov 2009                                | 18                        | 4 mo–12 y                                 | Yes                           | D8                         |
| Orissa            | Aug 2006–Jan 08                                  | 33                        | 7 mo–11 y                                 | Yes                           | D8                         |
| Sikkim            | May 2008–Jul 2008                                | 22                        | 2 mo–27 y                                 | Yes                           | D4, D8                     |
| Tamil Nadu        | Jan 2005–Jan 2007                                | 129 (13 virus isolates)   | <1–15 y                                   | Yes                           | D4, D7, D8                 |
| Tripura           | Mar 2007–Apr 2007                                | 6                         | 8 mo–17 y                                 | Yes (17 y old IgM +)          | D8                         |
| Uttar Pradesh     | Jan 2006–Feb 2006                                | 10                        | 9 mo–11 y                                 | Yes                           | D4, D8                     |
| Uttar Pradesh     | Oct 2006                                         | 12                        | 3–8 y                                     | Yes                           | NA                         |
| Uttaranchal       | Oct 2005, Jan 2007                               | 96                        | 6 mo–14 y, one 23-year-old pregnant woman | Yes (Pregnant, IgM measles +) | D8                         |
| West Bengal       | Feb 2006–May 2007                                | 96                        | 3 mo–16 y                                 | Yes                           | D8                         |

**NOTE.** NA, not applicable; IgM, immunoglobulin M.

an indication of circulation of measles strains that could be transmitted to other areas.

### Measles Genotype Circulation in India

Table 1 described the indigenous measles genotypes circulating in India in the states covered in this study. During the study period, D4, D8, and D7 genotypes were circulating in various parts of India. Though circulation of D4 and D8 have been documented since 1996 [4] and continued in the study period, the D7 genotype was found to have limited circulation in 3 cities only [5]. Genotype A had not been detected in this period. In this study, we detected no additional D7 genotypes, which indicates either limited circulation of D7 or insufficient molecular

surveillance in the country. During the study period, investigators documented measles genotypes D4, D7, and D8 only.

### Intragenotype Differentiation

On further phylogenetic analysis of all the D8 N-gene sequences (Figure 2), we found that the Indian measles D8 genotype could be differentiated into 4 distinct lineages, labeled D8a, D8b, D8c, and D8d.

We used MVi/Tumkur.Ind/04.08 (Genbank accession number FJ719484) as the reference strain for the D8a genotype. D8a was the most diverse genotype circulating from 2005 to 2010, in the geographically diverse states Maharashtra, Karnataka, Andhra Pradesh, Orissa, Gujarat, Sikkim, Kerala, and Manipur.

**Table 2. Age-Group Distribution of Investigated Cases and IgM Positivity**

| Age        | IgM + for measles<br>Number of positive results/<br>number of samples tested (%) | IgM + for rubella<br>Number of<br>positive results |
|------------|----------------------------------------------------------------------------------|----------------------------------------------------|
| 0–6 mo     | 11/22 (50%)                                                                      |                                                    |
| 6 mo–1 y   | 37/57 (64.9%)                                                                    |                                                    |
| 1–3 y      | 86/128 (67.2%)                                                                   |                                                    |
| 3–6 y      | 155/240 (64.6%)                                                                  | 1                                                  |
| 6–12 y     | 130/205 (63.4%)                                                                  | 3                                                  |
| 12–15 y    | 14/23 (60.9%)                                                                    |                                                    |
| >15 y      | 31/62 (50%)                                                                      | 5                                                  |
| Unrecorded | 9/16 (56.2%)                                                                     |                                                    |
| TOTAL      | 473/753 (62.8%)                                                                  | 9                                                  |

**NOTE.** IgM, immunoglobulin M.

Circulation of D8a was detected mostly in central, western, and southern India. We designated MVi/Gulberga.Ind/14.07 (Genbank Accession number FJ979796) the reference strain for the D8b genotype that was circulating from 2005 through 2009 in the states of Assam, West Bengal, Uttar Pradesh,

**Table 3. Age-Group Distribution of Investigated Cases and IgM Positivity**

| Age        | Cases investigated<br>N (%) | Samples tested<br>n (%) | IgM + for measles<br>n (%) | IgM + for rubella<br>n |
|------------|-----------------------------|-------------------------|----------------------------|------------------------|
| 0–6 mo     | 22 (2.6)                    | 22 (2.9)                | 11 (2.3)                   |                        |
| 6 mo–1 y   | 63 (7.5)                    | 57 (7.6)                | 37 (7.8)                   |                        |
| 1–3 y      | 146 (17.3)                  | 128 (17)                | 86 (18.8)                  |                        |
| 3–6 y      | 278 (33)                    | 240 (31.8)              | 155 (32.8)                 | 1                      |
| 6–12 y     | 231 (27.3)                  | 205 (27.2)              | 130 (27.5)                 | 3                      |
| 12–15 y    | 25 (3)                      | 23 (3)                  | 14 (3)                     |                        |
| >15 y      | 64 (7.6)                    | 62 (8.2)                | 31 (6.6)                   | 5                      |
| Unrecorded | 16 (1.9)                    | 16 (2.1)                | 9 (1.9)                    |                        |
| TOTAL      | 845 (100)                   | 753 (100)               | 473 (100)                  | 9                      |

**NOTE.** IgM, immunoglobulin M.

Himachal Pradesh, Arunachal Pradesh, Nagaland, and Andaman and Nicobar islands. We designated MVs/Papumpare.Ind/51.07/1 (Genbank Accession number EU812248) the reference sequence for the D8c genotype. No isolate as yet has been made from this genotype. Circulation of this genotype was seemingly

**Table 4. Seasonality Pattern of Measles Transmission**

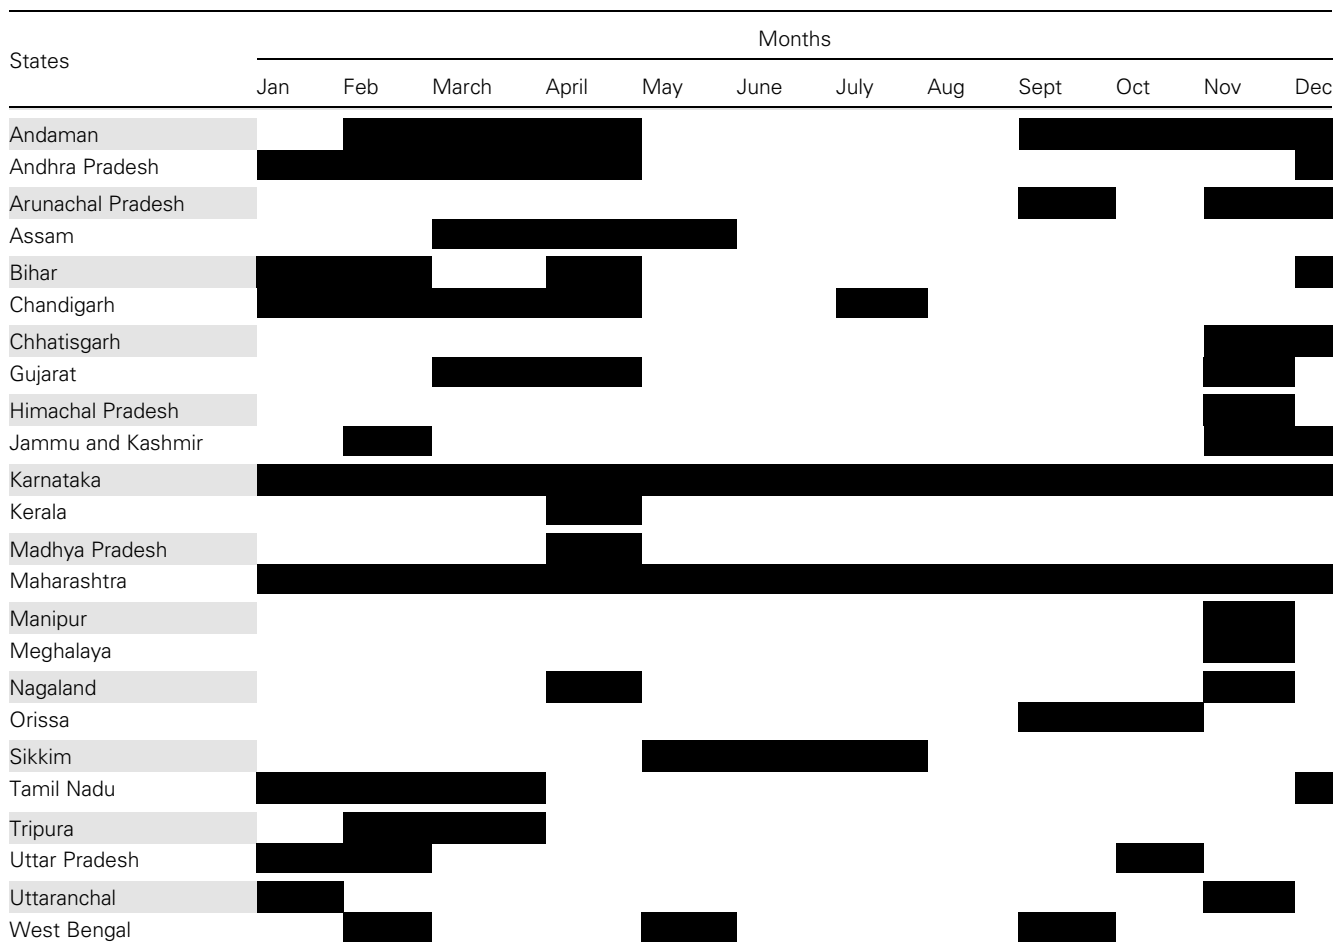

**NOTE.** ■ Measles transmission  
□ Transmission not detected

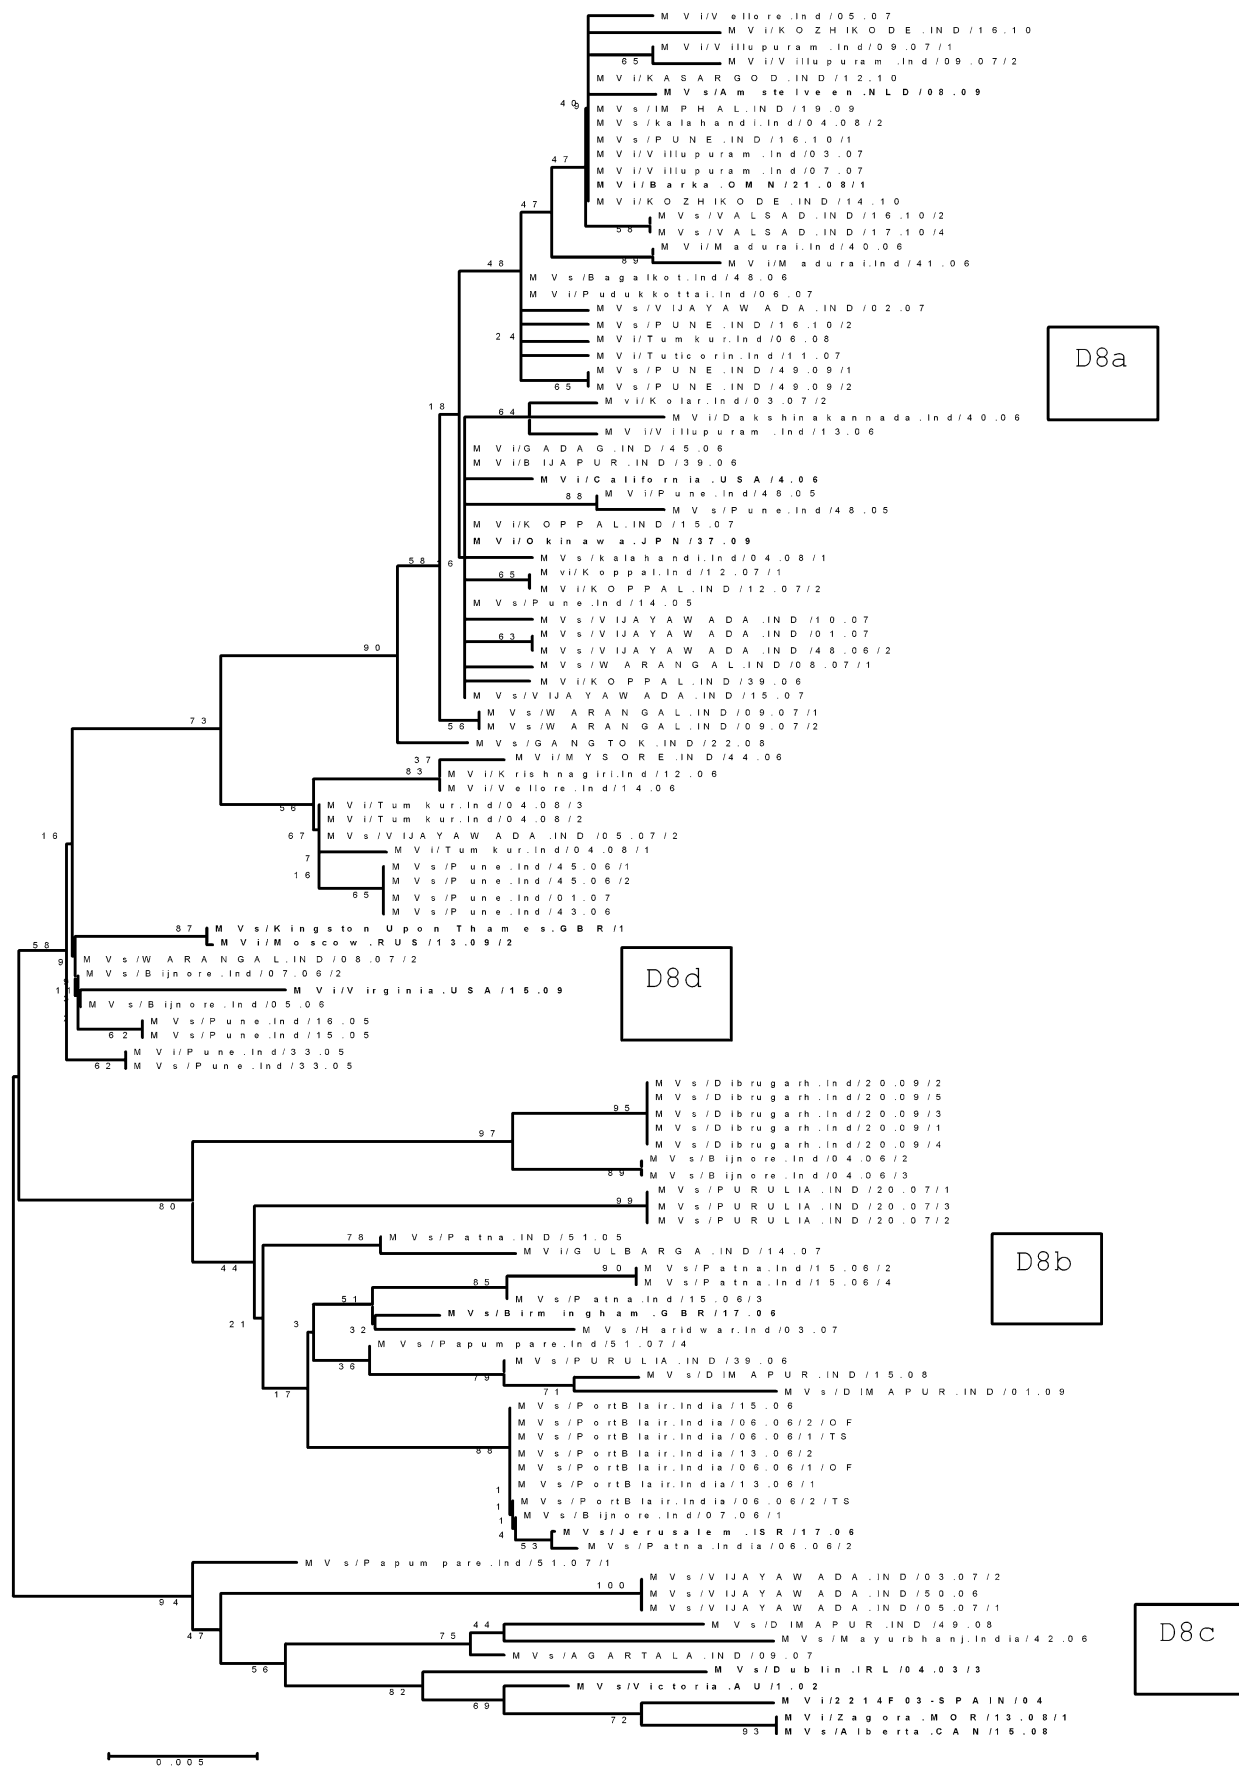

Figure 2. Indian D8 lineages (N gene).

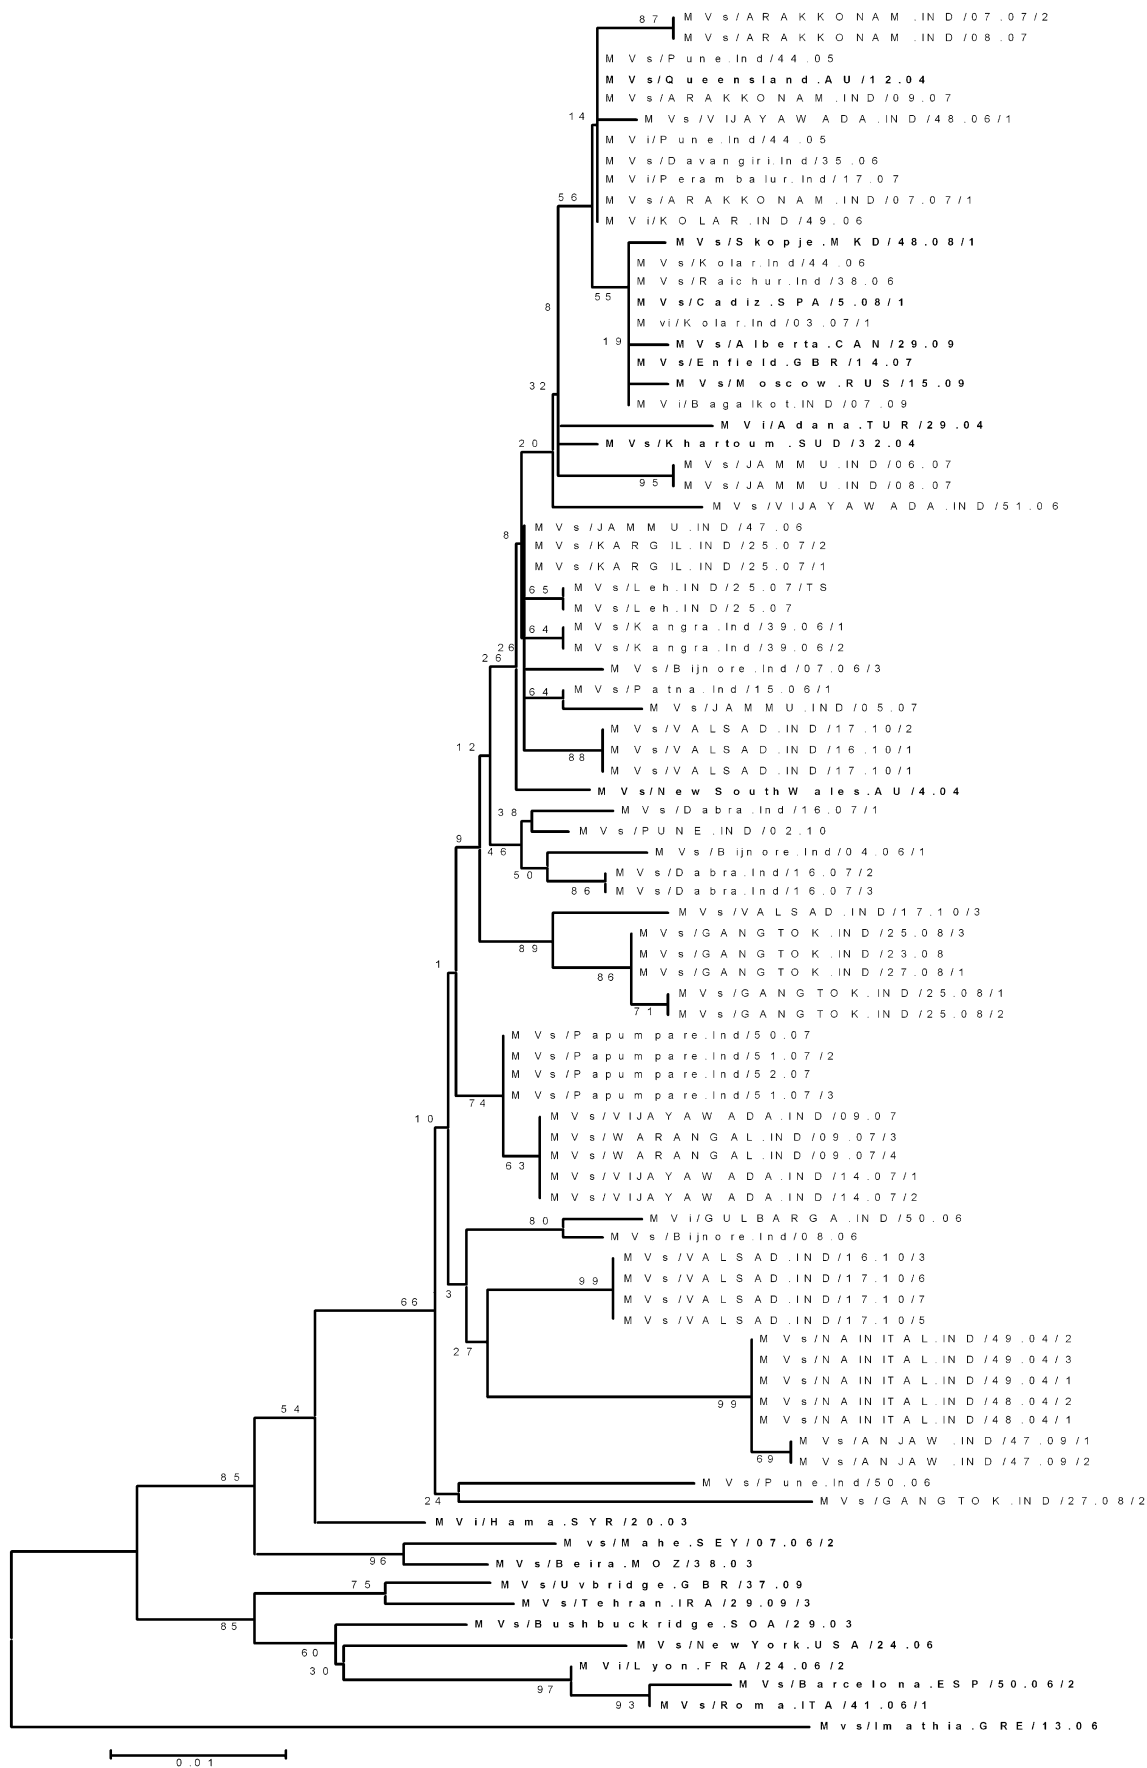

**Figure 3.** Indian D4 genotype (N gene).



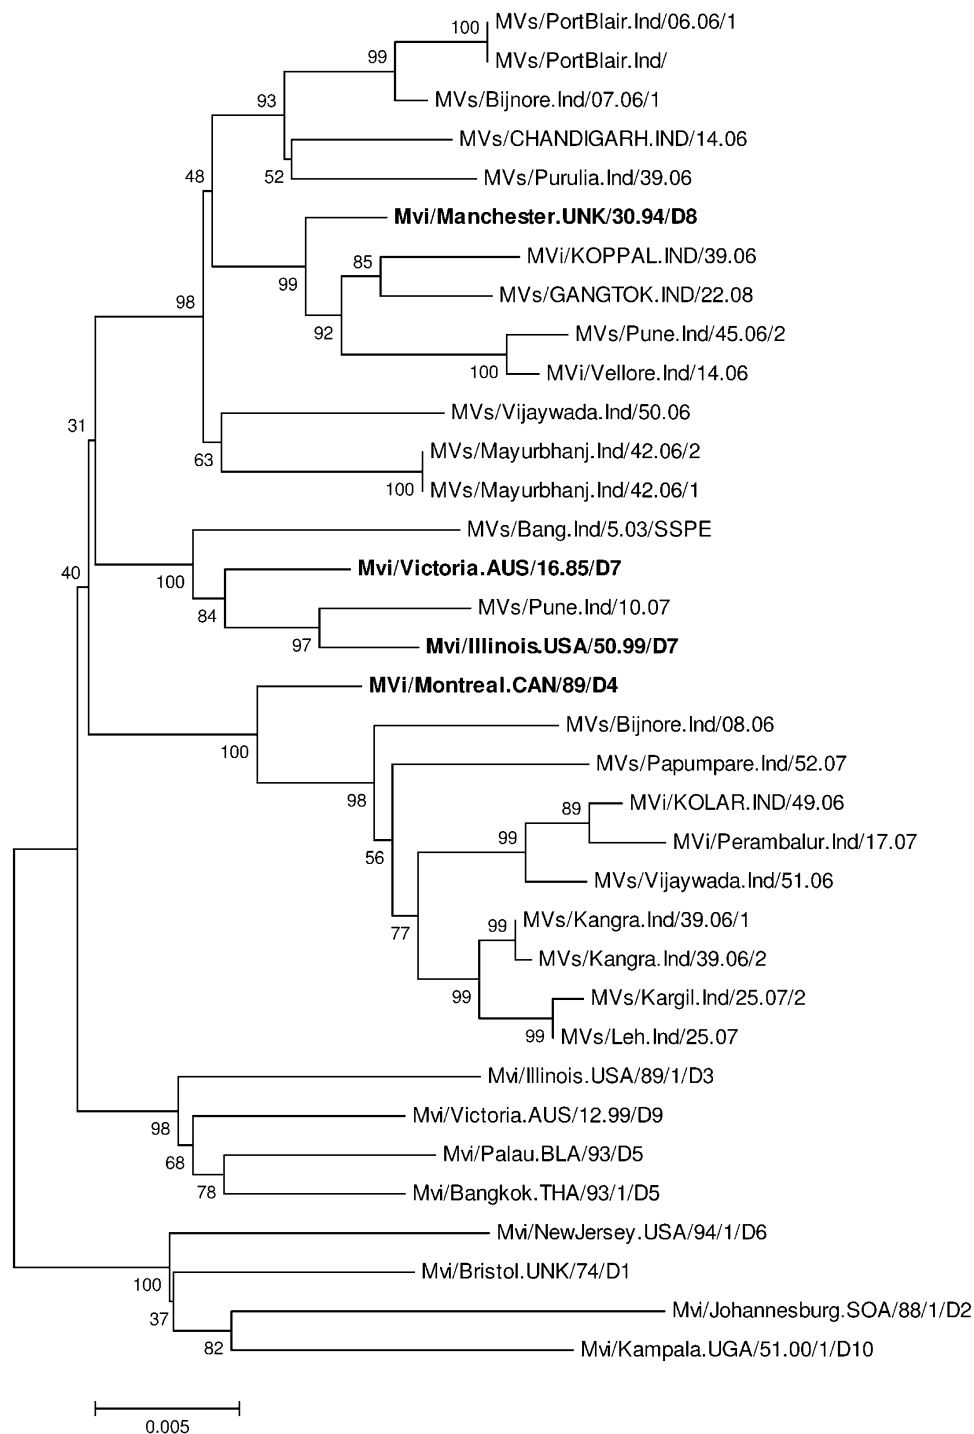

**Figure 4.** Phylogenetic analysis of H-gene sequences from India.

limited to Andhra Pradesh, Orissa, and northeastern states of Nagaland and Tripura during 2006–2008. We designated MVi/Pune.Ind/33.05 (Genbank Accession number FJ223159) the reference strain for the D8d genotype. Circulation of this genotype was limited between 2005 and 2007 to Maharashtra, Andhra Pradesh, and Uttar Pradesh. Our study did not document further detection of this genotype.

Previous studies have documented of H1, D4, and D6 genotypes in China [26], the Russian Federation [10], Indian Ocean islands [27], and Kenya [28]. Multiple lineages of genotype B3 have been detected in association with endemic circulation of measles in Africa [29]. It would be interesting to see how the circulation of these Indian D8 subclusters would evolve in time, especially under pressure of vaccination campaigns in some

areas. Genetic heterogeneity of dominant genotype D8 in India appears to be due to the presence of multiple, cocirculating lineages of this virus, indicating unrestricted transmission across geographic areas, somewhat similar to circulation of the dominant H1 genotype in China [26].

A Kenyan study [28] found subclustering of D4 into 4 different groups: Montreal-like, India-like, Johannesburg-like, and Ethiopia-like subclusters. Phylogenetic analysis could not differentiate the Indian D4 genotype (Figure 3) into distinct lineages. With multiple chains of transmission, the genotype could emerge with a distinct pattern in the future, which should be studied by countrywide surveillance.

To date, the D7 genotype has been found in only 3 cases from India, but analysis of the H-gene sequences reveals genetic diversity that suggests 3 different lineages of D7 circulating in India, each of which evolved over time [5]. Studies associated MeV genotype D7 with measles cases in Europe during the late 1990s and early 2000s [30], but the genotype has not been detected in Europe since 2005 [31]. The link between Indian and European D7 genotypes is not now clear. Subsequent data from both continents and molecular evolution studies might explain a link.

For all the genotypes detected, N-gene data correlated well with H-gene data (Figure 4).

We documented cocirculation of D4 and D8 genotypes in multiple areas in our study. Cocirculation of D8b and D8c has been noted in 1 outbreak from Arunachal Pradesh. Other countries have also documented cocirculation of genotypes, probably due to multiple chains of transmission during an outbreak [32, 33].

Though measles surveillance in India is in its infancy, during the preceding 15 years only Clade D genotypes (D4, D7, D8) have been detected in India, whereas surrounding countries have detected D4, D7, D8, D9, D5, H1, d11, and G3 genotypes [8, 14]. These external genotypes were not imported into India between 1995 and 2010. The possibilities of missing genotypes or of importation of other genotypes must be further studied and documented with continuous countrywide molecular surveillance in India.

In the study period, sequencing was performed on autopsied specimens from a case of SSPE [34] and a case of MIBE (Shankar et al unpublished data). There is a paucity of studies documenting genotypes identified from SSPE cases [35, 36], but such cases could be a good resource in India to find missing links in past measles transmission.

Though we investigated only representative measles outbreaks in the laboratory, the baseline sequence data generated from our study will be useful in the future, to track transmission pathways of Indian strains worldwide and to document importation of globally circulating genotypes into India. NIV at Pune is an accredited WHO reference laboratory for measles in India that will continue the MeaslesNetIndia work and molecular surveillance to monitor the circulation of measles lineages in the

Indian states. NIV efforts would be complementary to WHO-SEAR efforts. The molecular database would expand with the expansion of laboratory-based measles surveillance in India. Increased international collaborations, real-time outbreak investigations supported by molecular studies, and a global sequence database would help document the pathways of measles transmission to, from, and within India. The current study has demonstrated the effective use of molecular methods to monitor the measles scenario and the changing epidemiology of measles in modern India.

## Funding

This work was supported by the World Health Organization Initiative for Vaccine Research (WHO - IVR grant (V21/181/166); the Indian Council of Medical Research, North East Initiative (grant (18/3/1)2006/MNE/ECD-I); the World Health Organization-India; Outbreak investigations were done by Measles Net India collaborators using their institutional resources. Intramural funds from NIV, Pune were also utilized in addition to extramural grants for sequencing studies.

## Acknowledgments

Authors gratefully acknowledge the help and assistance from the MeaslesNetIndia collaborators and their staff members (as listed below); various state government public health authorities; Dr Lalit Kant, and Prof. N. K. Ganguly Indian Council of Medical Research; Staff Members of Measles Group of NIV, Pune; students of Field Epidemiology Training Programme (FETP) of National Institute of Epidemiology, Chennai; Drs Manish Kakkar, Paul Francis, and Sampath Krishnan of the WHO-India country office; Drs Yuri Pervikov, Marie- Paule Kiney, Joachim Hombach, and David Featherstone of WHO-IVB, Geneva; Dr Paul Rota, Centers for Disease Control and Prevention, and the participants of the study, the children with measles infection.

MeaslesNetIndia Collaborators:

National Institute of Virology, Pune; National Institute of Epidemiology, Chennai; National Institute of Cholera and Enteric Diseases, Kolkata; Regional Medical Research Center, Dibrugarh; Rajendra Memorial Research Institute of Medical Sciences, Patna; Desert Medicine Research Centre, Jodhpur; Regional Medical Research Centre (ICMR), Andaman & Nicobar Islands; Regional Medical Research Centre for Tribals, Jabalpur; Regional Medical Research Centre, Bhubaneswar; NIV, Bangalore Field Unit, Bangalore; Dept. of Virology, Manipal Medical College, Manipal; Pasteur Institute, Coonoor; Dept. of Preventive Social Medicine, Government Medical College, Nagpur; Dept. of Microbiology, BJMC, Ahmedabad; Dept. of Virology, PGI, Chandigarh; Sanjay Gandhi Post Graduate Institute, Lucknow; Assam Medical College Dibrugarh, Guwahati Medical College, Assam; State Epidemiologist, Naharlagun, Arunachal Pradesh; Regional Institute of Medical Sciences, Manipur; North Eastern Indira Gandhi Regional Institute of Health & Medical Sciences, Shillong, Meghalaya; Pediatricians, Dimapur, Nagaland; Government Medical College, Agartala, Tripura; Aizwal Civil Hospital, Mizoram; Sikkim Manipal Institute of Medical Sciences, Gangtok, Sikkim; World Health Organization National Reference Laboratory for Measles and Rubella, King Institute of Preventive Medicine, Chennai.

## References

1. World Health Organization. Global reductions in measles mortality 2000–2008 and the risk of measles resurgence. *Wkly Epidemiol Rec* **2009**; 84:509–16.
2. Rota PA, Featherstone DA, Bellini WJ. Molecular epidemiology of measles virus. *Curr Top Microbiol Immunol* **2009**; 330:129–50.

3. Rota PA, Liffick SL, Rota JS, et al. Molecular epidemiology of measles viruses in the United States, 1997–2001. *Emerg Infect Dis* **2002**; 8:902–8.
4. Wairagkar NS, Rota PA, Liffick S, Shaikh NJ, Padbidri VS, Bellini WJ. Characterization of measles sequences from Pune, India. *J Med Virol* **2002**; 68:611–4.
5. Vaidya SR, Wairagkar NS, Raja D, et al. First detection of measles genotype D7 from India. *Virus Genes* **2008**; 36:31–4.
6. Rota PA, Bellini WJ. Update on the global distribution of genotypes of wild type measles viruses. *J Infect Dis* **2003**; 187:S270–6.
7. World Health Organization. Global distribution of measles and rubella genotypes—update. *Wkly Epidemiol Rec* **2006**; 81:474–9. Accessed 10 September 2010.
8. Zhang Y, Ding Z, Wang H, et al. New measles virus genotype associated with outbreak, China. *Emerg Infect Dis* **2010**; 16:943–7.
9. Cheng WY, Lee L, Rota PA, Yang DC. Molecular evolution of measles viruses circulated in Taiwan 1992–2008. *Virol J* **2009**; 6:219.
10. Shulga SV, Rota PA, Kremer JR, et al. Genetic variability of wild-type measles viruses, circulating in the Russian Federation during the implementation of the National Measles Elimination Program, 2003–2007. *Clin Microbiol Infect* **2009**; 15:528–37.
11. Tipples GA, Gray M, Garbutt M, Rota PA; and Canadian Measles Surveillance Program. Genotyping of measles virus in Canada: 1979–2002. *J Infect Dis* **2004**; 189:S171–6.
12. Chibo D, Birch CJ, Rota PA, Catton MG. Molecular characterization of measles viruses isolated in Victoria, Australia, between 1973 and 1998. *J Gen Virol* **2000**; 81:2511–8.
13. Zhang Y, Zhu Z, Rota PA, et al. Molecular epidemiology of measles viruses in China, 1995–2003. *Virol J* **2007**; 4:14.
14. World Health Organization. Update of the nomenclature for describing the genetic characteristics of wild-type measles viruses: New genotypes and reference strains. *Wkly Epidemiol Rec* **2003**; 78:229–32.
15. Wairagkar NS, et al. MeaslesNetIndia—A new model of measles surveillance network in India. In: Proceedings of the International Meeting on Emerging Diseases and Surveillance; 23–25 February, **2007**; Vienna, Austria. Poster 12.022.
16. Expanded Programme on Immunization (EPI) Team. Manual for the laboratory diagnosis of measles and rubella virus infection. 2nd ed. Geneva, Switzerland: World Health Organization, Dept. of Immunization, Vaccines and Biologicals; 2007. [http://www.who.int/immunization\\_monitoring/LabManualFinal.pdf](http://www.who.int/immunization_monitoring/LabManualFinal.pdf). WHO publication WHO/IVB/07.01 Accessed 10 September 2010.
17. Wairagkar NS, Sugunan AP, Khedekar DD, Raibagkar SD. Usefulness of oral fluid samples to detect measles virus by RT-PCR. In: VED 1, Proceedings of the 7th Asia-Pacific Congress of Medical Virology. 13–15 November, New Delhi, India, **2006**; 110.
18. Tatsuo H, Ono N, Tanaka K, Yanagi Y. SLAM (CDw150) is a cellular receptor for measles virus. *Nature* **2000**; 406:893–7.
19. Waku-Koumou D, Wild TF. Adaptation of wild-type measles virus to tissue culture. *J Virol* **2002**; 76:1505–9.
20. Tamura K, Dudley J, Nei M, Kumar S. MEGA4: Molecular Evolutionary Genetics Analysis (MEGA) software version 4.0. *Mol Biol Evol* **2007**; 24:1596–9.
21. Parray SH, Gaash B, Ahmad M, Kadri SM. Changing face of measles in Kashmir. *Indian J for the Practising Doctor* **2008**; 5:5–6.
22. Wairagkar NS, Shaikh NJ, Udavant P, Banerjee K. Isolation of measles virus below 4 months of age during an outbreak in Pune, India. *Lancet* **1998**; 351:495–6.
23. Mohan A, Murhekar MV, Wairagkar NS, Hutin YJ, Gupte MD. Measles transmission following tsunami in a population with high one dose vaccination coverage, Tamil Nadu, India 2004–2005. *BMC Infect Dis* **2006**; 6:143.
24. Gupta SN, Gupta N. Two highly immunized hilly areas versus double measles outbreak investigations in district Kangra, Himachal Pradesh, India, in 2006. *J Glob Infect Dis* **2009**; 1:14–20.
25. Ramamurthy N, Raja D, Gunasekaran P, Varalakshmi E, Mohana S, Jin L. Investigation of measles and rubella outbreaks in Tamil Nadu, India—2003. *J Med Virol* **2006**; 78:508–13.
26. Ji Y, Zhang Y, Xu S, et al. Measles resurgence associated with continued circulation of genotype H1 viruses in China, 2005. *Virol J* **2009**; 6:135.
27. Waku-Koumou D, Landreau D, Olivier S, et al. Molecular characterization of measles virus circulating in the Indian Ocean Islands during 2005–2006 and in France in 2006. *J Med Virol* **2007**; 79:1381–7.
28. Mbugua FM, Okoth FA, Gray M, et al. Molecular epidemiology of measles virus in Kenya. *J Med Virol* **2003**; 71:599–604.
29. Haddad-Boubaker S, Rezq M, Smeo MN, et al. Genetic characterization of clade B measles viruses isolated in Tunisia and Libya 2002–2009 and a proposed new subtype within the B3 genotype. *Virus Res* **2010**; 153:258–64.
30. Santibanez S, Tischer A, Heider A, Siedler A, Hengel H. Rapid replacement of endemic measles virus genotypes. *J Gen Virol* **2002**; 83:2699–708.
31. Kremer JR, Brown KE, Li J et al. High genetic diversity of measles virus, World Health Organization European Region, 2005–2006. *Emerg Infect Dis* **2008**; 14/1:107–14.
32. Waku-Koumou D, Freymuth F, du Châtelet IP, Wild TF, Horvat B. Co-circulation of multiple measles virus genotypes during an epidemic in France in 2008. *J Med Virol* **2010**; 82:1033–43.
33. Gouandjika-Vasilache I, Waku-Koumou D, Ménard D, et al. Cocirculation of measles virus genotype B2 and B3.1 in Central African Republic during the 2000 measles epidemic. *J Med Virol* **2006**; 78:964–70.
34. Mahadevan A, Vaidya SR, Wairagkar NS, et al. Case of fulminant-SSPE associated with measles genotype D7 from India: An autopsy study. *Neuropathology* **2008**; 28:621–6.
35. Jin L, Beard S, Hunjan R, Brown DW, Miller E. Characterization of measles virus strains causing SSPE: A study of 11 cases. *J Neurovirol* **2002**; 8:335–44.
36. Rota JS, Heath JL, Rota PA, et al. Molecular epidemiology of measles virus: Identification of pathways of transmission and implications for measles elimination. *J Infect Dis* **1996**; 173:32–7.

## APPENDIX

### MeaslesNetIndia Collaborators

Arun Kumar,<sup>7</sup> Biswas AK,<sup>8</sup> Bag B,<sup>8</sup> Debberma S,<sup>9</sup> Dhole TN,<sup>10</sup> De Shobhan,<sup>8</sup> Das PK,<sup>8</sup> Dwibedi B,<sup>11</sup> Gupta SN,<sup>12</sup> Illankumar M,<sup>13</sup> Jampa L,<sup>14</sup> Ketkar A,<sup>15</sup> Kumar Navin,<sup>3</sup> Kumar Rajeev,<sup>16</sup> Khobragade P,<sup>17</sup> Kadri SM,<sup>18</sup> Mahadevan A,<sup>19</sup> Murhekar M,<sup>20</sup> Gupte MD,<sup>20</sup> Martolia H,<sup>21</sup> Mazi Dipankar,<sup>7</sup> Ratho RK,<sup>22</sup> Shankar SK,<sup>19</sup> Slathia S,<sup>23</sup> Sugunan AP,<sup>24</sup> Vittal CSN,<sup>25</sup> Vijaykumar G,<sup>26</sup> Vashishtha VM.<sup>27</sup>

<sup>3</sup>Rajendra Memorial Research Institute of Medical Sciences, Patna; <sup>7</sup>Manipal Centre for Virus Research, Manipal University, Manipal, Karnataka; <sup>8</sup>Directorate of Health Services, West Bengal; <sup>9</sup>Government Medical College, Agartala, Tripura; <sup>10</sup>Sanjay Gandhi Post Graduate Institute, Lucknow, Uttar Pradesh; <sup>11</sup>Regional Medical Research Center, Bhubaneswar, Orissa; <sup>12</sup>Regional Health and Family Welfare Training Centre, Kangra, Himachal Pradesh; <sup>13</sup>Station Health Organization (Navy), Mumbai, Maharashtra; <sup>14</sup>Directorate of Health Services, Naharlagun, Arunachal Pradesh; <sup>15</sup>General practitioner, Gwalior, Madhya Pradesh; <sup>16</sup>Happy Family Hospital, Roorkee, Uttarakhand; <sup>17</sup>United Nations Children's Fund (UNICEF); Raipur, Chhatisgarh; <sup>18</sup>Regional Institute of Health and Family Welfare, Srinagar, Kashmir; <sup>19</sup>Human Brain Tissue Repository, Department of Neuropathology, National Institute of Mental Health and Neuro Sciences, Bangalore; <sup>20</sup>National Institute of Epidemiology, Chennai, Tamil Nadu; <sup>21</sup>Directorate of Health Services, Dehradun, Uttarakhand; <sup>22</sup>Post Graduate Institute of Medical Education and Research, Chandigarh; <sup>23</sup>General hospital, Jammu; <sup>24</sup>Regional Medical Research Center, Portblair; <sup>25</sup>NRI Medical College, Chinakakani, Guntur; <sup>26</sup>Kakatiya Medical College, Warangal, Andhra Pradesh, and <sup>27</sup>Mangla Hospital & Research Center Bijnore, Uttar Pradesh, India.
